# Supplementary material for: Acquisition of naturally occurring antibody responses to recombinant protein domains of Plasmodium falciparum erythrocyte membrane protein 1
Source: PubMed Central journal article supplement (PMC2533674; doi:10.1186/1475-2875-7-155), 2008-08-16
Supplement: 1475-2875-7-155-S1.pdf [file 1475-2875-7-155-S1.pdf]

**Additional file 1****Mean OD values for positive standards on each plate**

|                | <b>DBL1<math>\alpha</math></b> | <b>DBL2<math>\beta</math></b> | <b>CIDR1<math>\alpha</math></b> | <b>DBL4<math>\gamma</math></b> | <b>DBL5<math>\beta</math></b> | <b>MBP</b> |
|----------------|--------------------------------|-------------------------------|---------------------------------|--------------------------------|-------------------------------|------------|
| <b>Plate 1</b> | 1.1202                         | 1.1397                        | 0.9024                          | 1.1683                         | 1.3895                        | 0.121      |
| <b>Plate 2</b> | 1.1108                         | 1.1226                        | 1.3671                          | 1.8854                         | 1.4034                        | 0.1845     |
| <b>Plate 3</b> | 0.9144                         | 1.2243                        | 1.6563                          | 1.5672                         | 1.5047                        | 0.215      |
| <b>Plate 4</b> | 1.5444                         | 0.8522                        | 1.5453                          | 1.8717                         | 1.4342                        | 0.1857     |
| <b>Plate 5</b> | 0.7314                         | 0.8761                        | 1.2338                          | 1.7454                         | 1.3065                        | 0.2185     |
| <b>Plate 6</b> | 1.2256                         | 0.9853                        | 1.3569                          | 1.9043                         | 1.2912                        | 0.3255     |
| <b>Plate 7</b> | 0.9583                         | 0.9005                        | 1.1546                          | 1.1245                         | 1.2821                        | 0.3856     |
| <b>Plate 8</b> | 0.9035                         | 0.9477                        | 1.2353                          | 0.9987                         | 1.4032                        | 0.3595     |
| <b>Plate 9</b> | 0.7939                         | 0.9692                        | 1.0998                          | 2.1162                         | 1.0316                        | 0.2921     |
| <b>Plate10</b> | 1.1977                         | 0.9925                        | 0.9330                          | 1.9973                         | 1.0716                        | 0.2637     |
| <b>Plate11</b> | 0.9526                         | 1.0287                        | 1.0606                          | 1.5867                         | 1.2253                        | 0.2421     |
| <b>Plate12</b> | 1.0383                         | 1.0194                        | 1.2984                          | 2.4884                         | 1.1616                        | 0.3018     |
| <b>Plate13</b> | 1.1635                         | 1.1951                        | 1.4672                          | 1.7228                         | 0.9746                        | 0.2095     |
| <b>Plate14</b> | 0.6623                         | 0.9911                        | 0.7065                          | 1.6870                         | 1.0387                        | 0.1121     |
| <b>Plate15</b> | 1.1558                         | 0.9503                        | 1.3965                          | 1.3228                         | 1.1724                        | 0.1734     |
