# Supplementary material for: Acquisition of naturally occurring antibody responses to recombinant protein domains of Plasmodium falciparum erythrocyte membrane protein 1
Source: PubMed Central journal article supplement (PMC2533674; doi:10.1186/1475-2875-7-155), 2008-08-16
Supplement: 1475-2875-7-155-S2.pdf [file 1475-2875-7-155-S2.pdf]

**Additional file 2**

**Range of OD values for 20 non-malaria exposed donors against each protein in turn**

|                                 | <b>Min</b> | <b>Max</b> | <b>Mean</b> | <b>Median</b> |
|---------------------------------|------------|------------|-------------|---------------|
| <b>DBL1<math>\alpha</math></b>  | 0.008822   | 0.252871   | 0.123316    | 0.128204      |
| <b>DBL2<math>\beta</math></b>   | 0.114934   | 0.290416   | 0.229632    | 0.207405      |
| <b>CIDR1<math>\alpha</math></b> | 0.159987   | 0.642002   | 0.240013    | 0.306897      |
| <b>DBL4<math>\gamma</math></b>  | 0.053602   | 0.44863    | 0.116846    | 0.150796      |
| <b>DBL5<math>\beta</math></b>   | 0.010768   | 0.343139   | 0.174313    | 0.178731      |
