# Supplementary material for: Acquisition of naturally occurring antibody responses to recombinant protein domains of Plasmodium falciparum erythrocyte membrane protein 1
Source: PubMed Central journal article supplement (PMC2533674; doi:10.1186/1475-2875-7-155), 2008-08-16

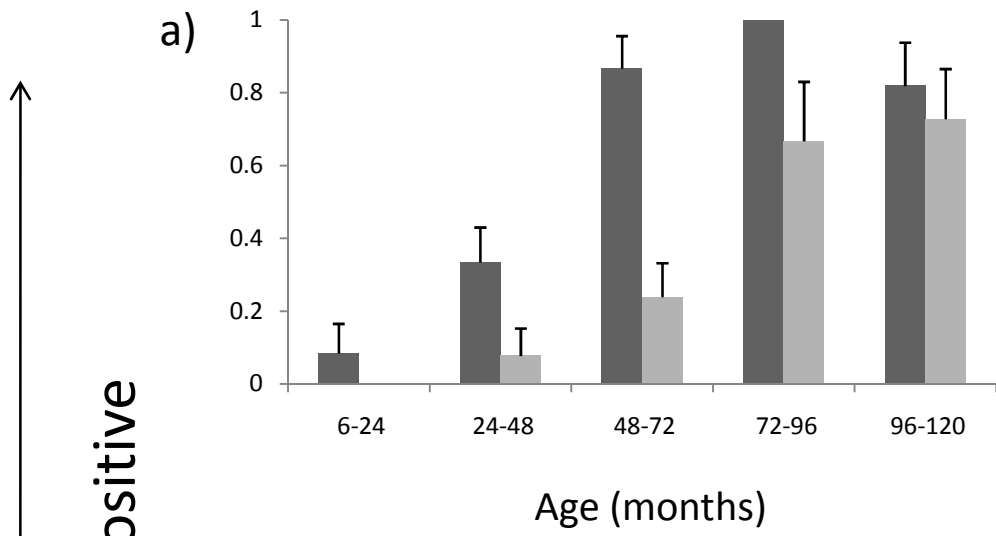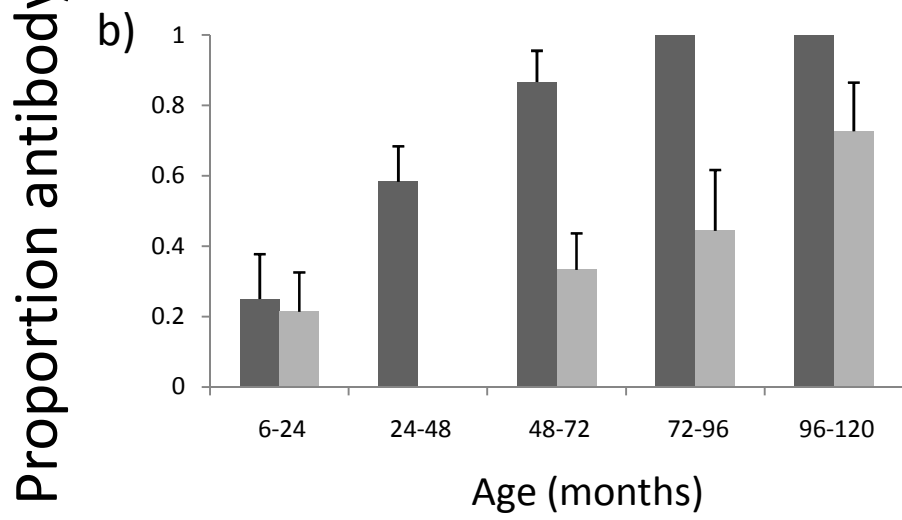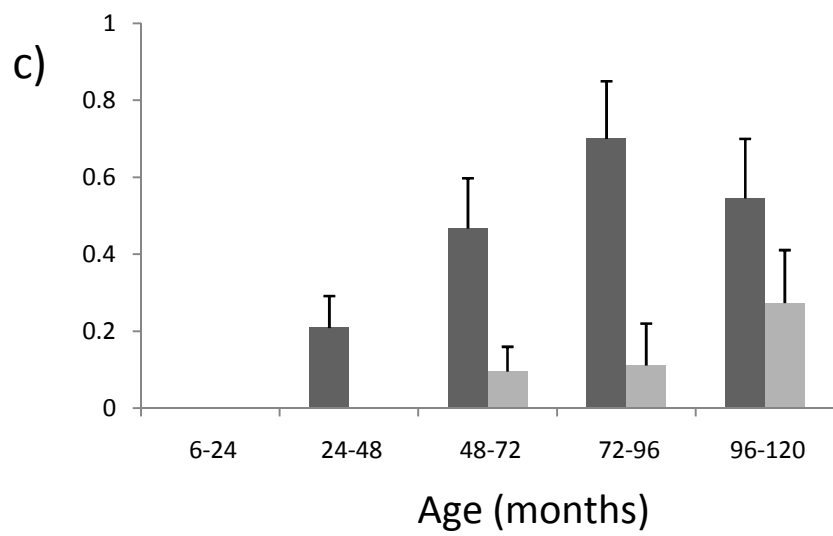

Supplement: 1475-2875-7-155-S3.pdf [file 1475-2875-7-155-S3.pdf]
